# Supplementary material
Source: MDPI journal article supplement (https://www.mdpi.com/2073-4395/14/2/249)
Supplement: s1 [file s1 › agronomy-2820092-supplementary.pdf]

**Table S1.** Equations of the modules for Energy balance, photosynthesis, and stomatal conductance.

| Equation                                                                                                                                                                                                                                         | Description                                                     | No. |
|--------------------------------------------------------------------------------------------------------------------------------------------------------------------------------------------------------------------------------------------------|-----------------------------------------------------------------|-----|
| <i>Greenhouse energy balance model</i>                                                                                                                                                                                                           |                                                                 |     |
| <i>North wall energy balance</i>                                                                                                                                                                                                                 |                                                                 |     |
| $R_w = \rho_w c_w n_0 * \frac{dT_w}{dt} + Q_{w,a}^c + Q_{w-w1}^{cond} + Q_{w-c} + Q_{w-r} + Q_{w-s} - Q_{p-w}$                                                                                                                                   | Energy balance for north wall inner surface temperature $T_w$ . | A1  |
| $\rho_w c_w d_1 * \frac{dT_{w1}}{dt} = \frac{k_w(T_w - T_{w1})}{n_1} - \frac{k_{w1}(T_{w1} - T_{wo})}{n_2}$                                                                                                                                      | Energy balance for north wall inner sub layer.                  | A2  |
| $\rho_w c_w d_2 * \frac{dT_{wo}}{dt} = \frac{k_{w1}(T_{w1} - T_{wo})}{n_2} - Q_{wo,T_o}^c - Q_{wo-sky}$                                                                                                                                          | Energy balance for north wall outer sub layer.                  | A3  |
| <i>North roof energy balance</i>                                                                                                                                                                                                                 |                                                                 |     |
| $R_r = \rho_r c_r f_0 * \frac{dT_r}{dt} + Q_{r,a}^c + Q_{r-r1}^{cond} + Q_{r-c} + Q_{r-w} + Q_{r-s} - Q_{p-r}$                                                                                                                                   | Energy balance for north roof inner surface temperature $T_r$ . | A4  |
| $\rho_r c_r f_1 * \frac{dT_{r1}}{dt} = \frac{k_r(T_r - T_{r1})}{f_1} - \frac{k_{r1}(T_{r1} - T_{ro})}{f_2}$                                                                                                                                      | Energy balance for north roof inner sub layer                   | A5  |
| $\rho_r c_r f_2 * \frac{dT_{ro}}{dt} = \frac{k_{r1}(T_{r1} - T_{ro})}{f_2} - Q_{ro,T_o}^c - Q_{ro-sky}$                                                                                                                                          | Energy balance for north roof outer sub layer                   | A6  |
| <i>Soil energy balance</i>                                                                                                                                                                                                                       |                                                                 |     |
| $R_s = \rho_s c_s z_0 * \frac{dT_s}{dt} + Q_{s,a}^c + Q_{s-s1}^{cond} + Q_{s,a}^l + Q_{s-c} + Q_{s-w} + Q_{s-r} - Q_{p-s}$                                                                                                                       | Energy balance for soil inner surface temperature $T_s$         | A7  |
| $\rho_s c_s z_1 * \frac{dT_{s1}}{dt} = \frac{k_s(T_s - T_{s1})}{z_1} - \frac{k_s(T_{s1} - T_{s2})}{z_2}$                                                                                                                                         | Energy balance for soil first sub layer                         | A8  |
| $\rho_s c_s z_2 * \frac{dT_{s2}}{dt} = \frac{k_s(T_{s1} - T_{s2})}{z_2} - \frac{k_s(T_{s2} - T_{s3})}{z_3}$                                                                                                                                      | Energy balance for soil second sub layer                        | A9  |
| <i>Front cover energy balance</i>                                                                                                                                                                                                                |                                                                 |     |
| $R_c = \rho_c c_c d_c * \frac{dT_c}{dt} + Q_{c,a}^c + Q_{c,o}^c + Q_{c-w} + Q_{c-r} + Q_{c-s} + Q_{c-p} + Q_{c-sky}$                                                                                                                             | Energy balance for front cover temperature $T_c$                | A10 |
| <i>Indoor air energy balance</i>                                                                                                                                                                                                                 |                                                                 |     |
| $\rho_a c_a V_a * \frac{dT_a}{dt} = A_c Q_{a,c}^c + A_w Q_{a,w}^c + A_r Q_{a,r}^c + A_s Q_{a,s}^c + A_p Q_{a,p}^c + A_s Q_{s,a}^l + A_p Q_{a,p}^l - Q_{inf}$                                                                                     | Energy balance for indoor air temperature $T_a$                 | A11 |
| <i>Parameters calculation</i>                                                                                                                                                                                                                    |                                                                 |     |
| $Q_{A,B}^c = -Q_{B,A}^c = h_{A,B}^c (T_A - T_B)$                                                                                                                                                                                                 | Convection energy exchange between surface A and surface B      | A12 |
| $h_{w,a}^c = h_{r,a}^c = 2.8; h_{s,a}^c = 1.52 T_s - T_a ^{0.33};$<br>$h_{c,a}^c = 1.95 T_a - T_c ^{0.3}; h_{c,o}^c = 2.8 + 3.0u_{out};$<br>$h_{wo,T_o}^c = 1.42(\frac{T_{wo}-T_o}{t})^{0.25}; h_{ro,T_o}^c = 1.42(\frac{T_{ro}-T_o}{t})^{0.25}$ | Calculation of sensible heat exchange coefficients              | A13 |
| $Q_{A-A1}^{cond} = \frac{k_A(T_A - T_{A1})}{t}$                                                                                                                                                                                                  | Conduction heat transfer from layer A to sub layer A1           | A14 |
| $Q_{s,a}^l = 0.0168fh_{sur}[(aT_s + b) - RH(aT_a + b)]$                                                                                                                                                                                          | Soil latent energy exchange with inner air                      | A15 |
| $Q_{A-B} = \epsilon_A \cdot \epsilon_B \cdot \chi_{A-B} \cdot \sigma \cdot (T_A^4 - T_B^4) \quad T_A, T_B \text{ in } K$                                                                                                                         | Thermal radiation exchange from unit surface A to surface B     | A16 |
| $Q_{A-sky} = \sigma \epsilon_A T_A^4 - \alpha_{ct} \sigma \epsilon_{sky} T_{sky}^4$                                                                                                                                                              | Radiation heat transfer from outer surface A to the sky         | A17 |
| $Q_{inf} = c_a \rho_a N H_w (T_a - T_o) / 3600$                                                                                                                                                                                                  | Cold air infiltration                                           | A18 |
| <i>Tomato leaf energy balance model</i>                                                                                                                                                                                                          |                                                                 |     |
| $R_p = Q_{p,a}^c + Q_{p,a}^l + Q E_p$                                                                                                                                                                                                            | Energy balance for leaf temperature $T_p$                       | B1  |
| $Q_{p,a}^c = 2g_h \rho_a c_a (T_p - T_a)$                                                                                                                                                                                                        | Tomato leaf sensible heat exchange                              | B2  |
| $Q_{p,a}^l = 2\lambda g_v (e_s(T_p) - e_a) / P_a$                                                                                                                                                                                                | Tomato leaf latent heat exchange                                | B3  |
| $Q E_p = \epsilon_p \cdot A_p \cdot \chi_{p-B} \cdot \sigma \cdot (T_p^4 - T_B^4)$                                                                                                                                                               | Leaf emitted thermal radiation                                  | B4  |
| $g_h = g_b * 0.135 / 0.147$                                                                                                                                                                                                                      | Leaf boundary layer conductance for heat transfer               | B5  |
| $g_v = \frac{0.5 * g_s g_b}{g_s + g_b}$                                                                                                                                                                                                          | Leaf boundary layer conductance                                 | B6  |
| $e_s(T_p) = 0.611 \exp(\frac{17.502T}{240.97 + T})$                                                                                                                                                                                              | Leaf saturation vapour pressure at T                            | B7  |
| <i>Photosynthesis model (FvCB model)</i>                                                                                                                                                                                                         |                                                                 |     |
| $A = V_c - 0.5V_o - R_d = \min\{A_c, A_j, A_p\} - R_d$                                                                                                                                                                                           | Net photosynthetic rate                                         | C1  |
| $A_c = V_{cmax} \frac{C_c - \Gamma_*}{C_c + K_c(1 + O/K_o)}$                                                                                                                                                                                     | Rubisco-limited photosynthetic rate                             | C2  |
| $A_j = \frac{J(C_i - \Gamma_*)}{4(C_i + 2\Gamma_*)}$                                                                                                                                                                                             | RuBP regeneration limited photosynthetic rate                   | C3  |

|                                                                                                                                                                           |                                                                                  |     |
|---------------------------------------------------------------------------------------------------------------------------------------------------------------------------|----------------------------------------------------------------------------------|-----|
| $\theta J^2 - (I_2 + J_{max})J + I_2 J_{max} = 0$                                                                                                                         | Light dependence of the rate of electron transport                               | C4  |
| $I_2 = I(1 - f)(1 - \delta)/2$                                                                                                                                            | PAR effectively absorbed by Photosystem II                                       | C5  |
| $A_p = 3P_u$                                                                                                                                                              | TPU limited photosynthetic rate                                                  | C6  |
| $K_T = k_{25} \exp [E_a(T_p - 25)/\{298R(T_p + 273)\}]$                                                                                                                   | Arrhenius function; temperature dependence of $K_c$ , $K_o$ , $R_d$ , $V_{cmax}$ | C7  |
| $J_{max} = J_{m25} \exp \left[ \frac{(T_p - 25)E_a}{R(T_p + 273)298} \right] \frac{[1 + \exp(\frac{S298 - H}{R298})]}{[1 + \exp(\frac{S(T_p + 273) - H}{R(T_p + 273)})]}$ | Temperature dependence of $J_{max}$                                              | C8  |
| $\Gamma^* = 36.9 + 1.88(T_p - 25) + 0.036(T_p - 25)^2$                                                                                                                    | Temperature dependence of $\Gamma^*$                                             | C9  |
| $f(\xi) = d_0(1 - \exp(-d_1\xi))\exp(-d_2\xi)$                                                                                                                            | Leaf age dependence of $J_{max}$ , $V_{cmax}$ and $P_u$                          | C10 |
| $C_i = C_a - A(\frac{1}{g_b} + \frac{1}{g_s})P_a$                                                                                                                         | Intercellular CO <sub>2</sub> concentration                                      | C11 |
| $C_c = C_i - \frac{A}{g_m}P_a$                                                                                                                                            | Chloroplastic CO <sub>2</sub> concentration                                      | C12 |
| $g_m = \frac{\exp(c - \frac{\Delta H_a}{RT_k})}{1 + \exp(\frac{\Delta S * T_k - \Delta H_d}{RT})}$                                                                        | Mesophyll conductance to CO <sub>2</sub>                                         | C13 |
| <i>Stomatal conductance model (BWB model)</i>                                                                                                                             |                                                                                  |     |
| $g_s = b + mA \frac{h_s}{(C_s/P_a)}$                                                                                                                                      | Stomatal conductance                                                             | D1  |
| $\Gamma = \frac{R_d(K_c(1 + O/K_o)) + V_{cmax}\Gamma^*}{V_{cmax} - R_d}$                                                                                                  | CO <sub>2</sub> compensation point in the presence of $R_d$                      | D2  |
| $C_s = C_a - \frac{A}{g_b}P_a$                                                                                                                                            | Estimation of CO <sub>2</sub> partial pressure at the leaf surface               | D3  |
| $g_b = 0.147\sqrt{u/d}$ (Gr/Re <sup>2</sup> > 1)                                                                                                                          | Boundary layer conductance for water vapor                                       | D4  |
| $g_b = 0.055 \cdot (\frac{T_p - T_a}{d})^{1/4}$ (Gr/Re <sup>2</sup> < 1)                                                                                                  |                                                                                  |     |
| $d = 0.72w$                                                                                                                                                               |                                                                                  |     |
| $a_h h_s^2 + b_h h_s + c_h = 0$ Where $\begin{cases} a_h = (g_1 A)/C_s \\ b_h = g_0 + g_b - (g_1 A/C_s) \\ c_h = (-RHg_b) - g_0 \end{cases}$                              | Quadratic equation to obtain $h_s$ by combining $g_s$ with diffusion equation    | D5  |

**Table S2.** Outer model loadings and significance. Original and sample mean for each simulated variable are shown, with standard deviation and *p*-values.

|                                          | Original Sample (O) | Sample (M) | Mean | Standard (STDEV) | Deviation | P Values |
|------------------------------------------|---------------------|------------|------|------------------|-----------|----------|
| Furrow Distance <- Canopy configuration  | 0.922               | 0.922      |      | 0.01             |           | 0        |
| Leaflet Absorption <- Radiation          | 0.822               | 0.822      |      | 0                |           | 0        |
| Leaflet Age <- Leaf age                  | 1                   | 1          |      | 0                |           |          |
| Leaflet Area <- Leaf area                | 1                   | 1          |      | 0                |           |          |
| Leaflet NetPsyn <- Photosynthesis        | 0.83                | 0.83       |      | 0.001            |           | 0        |
| Leaflet Temperature <- Temperature       | 0.793               | 0.793      |      | 0.001            |           | 0        |
| Plant Absorption <- Radiation            | 0.768               | 0.768      |      | 0.001            |           | 0        |
| Plant Distance <- Canopy configuration   | -0.887              | -0.886     |      | 0.014            |           | 0        |
| Plant Netpsyn <- Photosynthesis          | 0.692               | 0.692      |      | 0.002            |           | 0        |
| Plant Temperature <- Temperature         | 0.79                | 0.79       |      | 0.001            |           | 0        |
| Planting Pattern <- Canopy configuration | 0.351               | 0.351      |      | 0.027            |           | 0        |
| Row Distance <- Canopy configuration     | 0.153               | 0.153      |      | 0.027            |           | 0        |

**Table S3.** The path coefficients between the latent variables. Original and sample mean between each two latent variables are shown, with standard deviation and *p*-values.

|                                        | Original Sample<br>(O) | Sample Mean<br>(M) | Standard Deviation<br>(STDEV) | P<br>Values |
|----------------------------------------|------------------------|--------------------|-------------------------------|-------------|
| Canopy configuration -> Photosynthesis | -0.019                 | -0.019             | 0.001                         | 0           |
| Canopy configuration -> Radiation      | -0.036                 | -0.036             | 0.002                         | 0           |
| Canopy configuration -> Temperature    | 0.006                  | 0.006              | 0                             | 0           |
| Leaf age -> Radiation                  | -0.263                 | -0.263             | 0.002                         | 0           |
| Leaf age -> Temperature                | 0.036                  | 0.036              | 0                             | 0           |
| Leaf area -> Radiation                 | -0.065                 | -0.065             | 0.002                         | 0           |
| Leaf area -> Temperature               | -0.001                 | -0.001             | 0                             | 0           |
| Radiation -> Photosynthesis            | 3.734                  | 3.734              | 0.01                          | 0           |
| Radiation -> Temperature               | 1                      | 1                  | 0                             | 0           |
| Temperature -> Photosynthesis          | -2.881                 | -2.881             | 0.011                         | 0           |

**Table S4.** R<sup>2</sup> values for each Latent Variable in the inner model. Original and sample mean values R<sup>2</sup> values.

| LV             | Original Sample (O) | Sample Mean (M) | Standard Deviation (STDEV) | P Values |
|----------------|---------------------|-----------------|----------------------------|----------|
| Photosynthesis | 0.94                | 0.737           | 0                          | 0        |
| Radiation      | 0.78                | 0.532           | 0                          | 0        |
| Temperature    | 0.982               | 0.942           | 0                          | 0        |

**Table S5.** Specific indirect effects between the latent variables. Original and sample mean for each indirect path are shown, with standard deviation and *p*-values.

|                                                                    | Original<br>Sample (O) | Sample Mean<br>(M) | Standard<br>(STDEV) | Deviation | P<br>Value<br>s |
|--------------------------------------------------------------------|------------------------|--------------------|---------------------|-----------|-----------------|
| Leaf age -> Radiation -> Temperature                               | -0.263                 | -0.263             | 0.002               |           | 0               |
| Leaf area -> Radiation -> Temperature -> Photosynthesis            | 0.186                  | 0.186              | 0.005               |           | 0               |
| Canopy configuration -> Radiation -> Photosynthesis                | -0.133                 | -0.133             | 0.007               |           | 0               |
| Canopy configuration -> Temperature -> Photosynthesis              | -0.017                 | -0.017             | 0.001               |           | 0               |
| Canopy configuration -> Radiation -> Temperature                   | -0.036                 | -0.036             | 0.002               |           | 0               |
| Radiation -> Temperature -> Photosynthesis                         | -2.881                 | -2.881             | 0.011               |           | 0               |
| Canopy configuration -> Radiation -> Temperature -> Photosynthesis | 0.103                  | 0.103              | 0.006               |           | 0               |
| Leaf area -> Radiation -> Photosynthesis                           | -0.241                 | -0.241             | 0.007               |           | 0               |
| Leaf area -> Radiation -> Temperature                              | -0.065                 | -0.065             | 0.002               |           | 0               |
| Leaf area -> Temperature -> Photosynthesis                         | 0.004                  | 0.004              | 0.001               |           | 0               |
| Leaf age -> Temperature -> Photosynthesis                          | -0.105                 | -0.105             | 0.001               |           | 0               |
| Leaf age -> Radiation -> Photosynthesis                            | -0.981                 | -0.981             | 0.007               |           | 0               |
| Leaf age -> Radiation -> Temperature -> Photosynthesis             | 0.757                  | 0.757              | 0.006               |           | 0               |
